# Supplementary material for: Dual-responses for electrochemical and electrochemiluminescent detection based on a bifunctional probe
Source: Royal Society of Chemistry journal article supplement (doi:10.1039/c3cc49319a), 2014-01-01
Supplement: c3cc49319a1.pdf [file c3cc49319a1.pdf]

1 ***Supporting Information***

2

3 **Dual-responses for electrochemical and**  
4 **electrochemiluminescent detection based on a bifunctional**  
5 **probe**

6 **Jing Han, Ying Zhuo\*, Yaqin Chai and Ruo Yuan\***

7 *Key Laboratory on Luminescence and Real-Time Analysis, Ministry of Education,*  
8 *College of Chemistry and Chemical Engineering, Southwest University, Chongqing*  
9 *400715, PR China*

10

11 **EXPERIMENTAL SECTION**

12 **Reagents and materials**

13 Perylene-3, 4, 9, 10-tetracarboxylic dianhydride (C<sub>24</sub>H<sub>8</sub>O<sub>6</sub>, PTCDA) was purchased  
14 from Lian Gang Dyestuff Chemical Industry Co. Ltd (Liaoning, China). Toluidine  
15 blue (Tb), thrombin, hexanethiol (96%, HT) and gold chloride (HAuCl<sub>4</sub>) were  
16 obtained from Sigma Chemical Co. (St. Louis, MO, USA). K<sub>2</sub>S<sub>2</sub>O<sub>8</sub> was purchased  
17 from shanghai chemical Reagent company (Shanghai, China). Bovine serum albumin  
18 (BSA, 96-99 %), *N*-(3-dimethylaminopropyl)-*N*'-ethylcarbodiimidehydrochloride  
19 (EDC) and *N*-hydroxy succinimide (NHS) were purchased from Shanghai Medpep Co.  
20 Ltd. (Shanghai, China). All other chemicals were of reagent grade and used as  
21 received. Thrombin binding aptamers (TBA) were purchased from TaKaRa (Dalian,  
22 China), and the sequences of the oligonucleotides were as follows:

23 TBA: 5'-SH-(CH<sub>2</sub>)<sub>6</sub>-GGT TGG TGT GGT TGG-3'

24 Doubly distilled water was used throughout this study. 0.1 M HAc-NaAc (pH 5.5)  
25 was employed to investigate the performance of electrodes. 20 mM Tris-HCl buffer  
26 (pH 7.4) containing 140 mM NaCl, 5 mM KCl, 1 mM CaCl<sub>2</sub> and 1 mM MgCl<sub>2</sub> was  
27 used to prepare aptamer solutions.

## 28 **Apparatus**

29 The ECL emission was monitored with a model MPI-A  
30 electrochemiluminescence analyzer (Xi'an Remax Electronic Science & Technology  
31 Co., Ltd., Xi'an, China). Cyclic voltammetry (CV) and differential pulse voltammetry  
32 (DPV) were carried out with a CHI 660D electrochemical workstation (Shanghai CH  
33 Instruments, China). A conventional three-electrode system was used consisting of a  
34 modified gold electrode (AuE,  $\Phi = 4$  mm) as working electrode, an Ag/AgCl (sat.  
35 KCl) as reference electrode and a platinum wire as counter electrode, respectively.  
36 The scanning electron micrographs were taken with a scanning electron microscope  
37 (SEM, S-4800, Hitachi, Tokyo, Japan). X-ray photoelectron spectroscopy (XPS)  
38 measurement was carried out on a VG Scientific ESCALAB 250 spectrometer, using  
39 Al Ka X-ray (1486.6 eV) as the light source. UV-vis absorption spectra were recorded  
40 with a UV-2450 spectrophotometer (Shimadzu, Japan) at room temperature using a  
41 300  $\mu$ L black-body quartz cuvette with 1 cm path length. The Fourier transform  
42 infrared (FTIR) spectra were performed by using a Spectrum GX FTIR spectroscopy  
43 system (Perkin-Elmer, USA).

## 44 **Preparation of Bifunctional Probe (PTC-Tb)**

45 The synthesis was performed in the following manner. The first step: PTCA was  
 46 made by hydrolyzing PTCDA with 1 M NaOH until the colour of the solution  
 47 becoming yellow-green. After that the mixture solution was treated with HCl to  
 48 neutralize the excess NaOH, red precipitate appeared and the pH of the solution  
 49 maintained at slightly acidic. Subsequently, the product of PTCA was collected by  
 50 centrifuged and then dried under vacuum at 60 °C. The second step: 1 mg of the  
 51 above prepared PTCA was firstly dissolved in 5 mL an aqueous solution containing a  
 52 proper amount of EDC and NHS (4:1) and stirred for 6 h at ambient condition.  
 53 Afterwards, 1 mL of 5 mg mL<sup>-1</sup> Tb aqueous solution was added dropwise into the  
 54 above solution and the mixture was allowed to react overnight at 70-80 °C under  
 55 continuous stirring. The synthesized product (PTC-Tb) was centrifuged and then  
 56 washed with doubly distilled water. The process involved in fabricating the PTC-Tb is  
 57 shown schematically in SFig. 1.

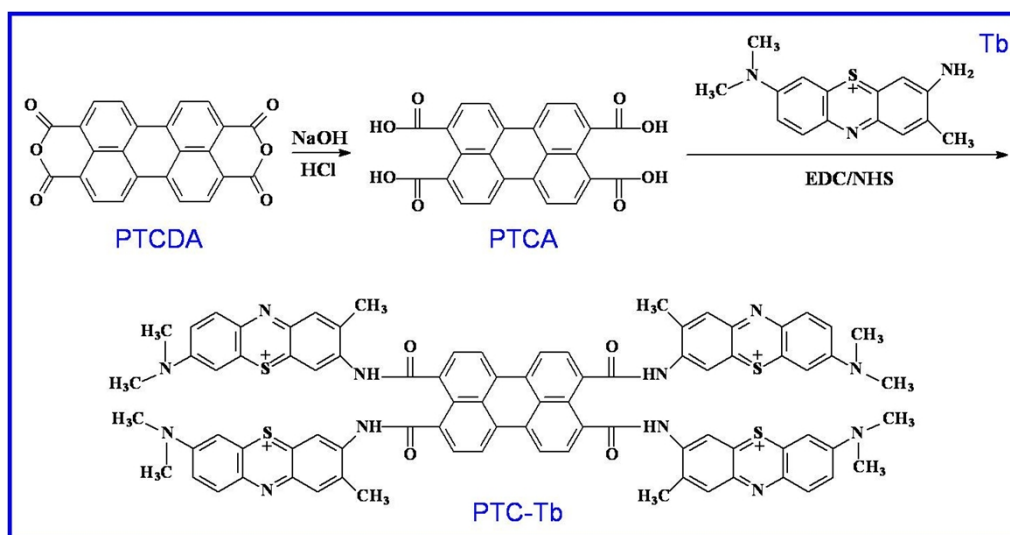

58  
 59 **SFig. 1.** Schematic diagram of the procedure used to prepare bifunctional PTC-Tb probe.

## 60 **Preparation of nano-Au**

61 Nano-Au was prepared according to the previous protocol [1]: In brief, 50 mL of

62 0.01%  $\text{HAuCl}_4$  solution was heated to boiling with vigorous stirring, and then 1.25  
63 mL 1% trisodium citrate solution was quickly added to the boiling solution. When the  
64 color of the solution turned deep red, the heating source was removed and the  
65 resulting solution was stirred for an additional 15 min to cool down at room  
66 temperature.

### 67 **Pretreated gold electrode**

68 To obtain mirror-like surface, gold electrode (AuE,  $\Phi = 4$  mm) was firstly  
69 polished successively with 0.3 and 0.05  $\mu\text{m}$  alumina powder to remove adsorbed  
70 organic substances. Then it was electrochemically cleaned in 0.1 M  $\text{H}_2\text{SO}_4$  *via*  
71 potential scanning between  $-0.2$  and  $+1.6$  V until a reproducible CV was obtained.  
72 Before modification, the AuE was dried with nitrogen at room temperature.

### 73 **Detection Measurements**

74 The EC detection in 0.1 M HAc-NaAc buffer solution (pH 5.5) was employed to  
75 investigate the performance of electrodes in the process of detection. DPV parameters  
76 applied were: 20 mV pulse amplitude, 50 ms pulse width, 0.2 s pulse period and  
77 voltage range from  $-0.6$  to  $0.1$  V. CV parameters applied were: the potential range  
78 from  $-0.6$  to  $0.2$  V at  $50 \text{ mV s}^{-1}$ . The ECL detection was performed at room  
79 temperature in a 10 mL homemade quartz cell. A high voltage of the photomultiplier  
80 tube was set at 800 V in the process of detection. The potential scan from  $-2.0$  to  $0$  V  
81 and the scan rate of  $0.1 \text{ V s}^{-1}$  was applied to obtain ECL signal in 0.1 M HAc-NaAc  
82 (pH 5.5) containing 5 mM  $\text{K}_2\text{S}_2\text{O}_8$ .

## 83 **RESULTS AND DISCUSSION**

## 84 Characterizations of the Nanomaterials by SEM

85 The morphology and microstructure of the as-prepared nanomaterials were  
86 investigated by SEM (SFig. 2) at an acceleration voltage of 30.0 kV. SFig. 2a shows  
87 the SEM image of PTC-Tb which displays irregular quadrateshaped islands with the  
88 large specific surface area. SFig. 2b shows the typical SEM image of nano-Au. After  
89 nano-Au was adsorbed onto PTC-Tb film, many bright dots can be found (SFig. 2c),  
90 implying the successful assembling of the nano-Au on the PTC-Tb surface through  
91 electrostatic interaction.

92

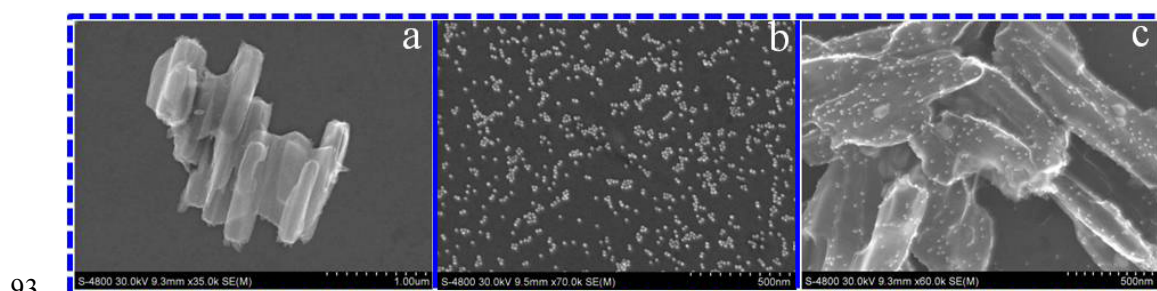

93

94 **SFig.2** SEM images of (a) PTC-Tb and (b) nano-Au and (c) nano-Au/PTC-Tb.

## 95 Characterizations of the Nanomaterials by XPS, UV-vis and FTIR spectra

96 XPS analysis provides effective information on the chemical composition of the  
97 as-prepared nanocomposite. The full XPS pattern of PTC-Tb is shown in SFig. 3A.  
98 The photoelectron peaks of C, N and O are clearly distinguishable, corresponding to  
99 the element of PTCA. The new peak at about 164.1 eV is observed, which is the  
100 positions of S2p, indicating the successfully prepared PTC-Tb. Furthermore, in order  
101 to further verify the interaction between PTCA and Tb, the UV-vis absorption spectra  
102 of Tb, PTCA and PTC-Tb are also studied. PTCA contains the wide absorption bands  
103 at 557 and 476 nm as well as a series of weak maxima at 370 and 376 nm (SFig. 3B,

curve a). From SFig 3B, Tb shows two characteristic peaks at 630 and 287 nm (SFig. 3B, curve b). A new absorption band appear at 615 nm with the disappearance of maxima at 557 and 630 nm after the formation of PTC-Tb, (SFig. 3B, curve c), elucidating the successful synthesis of PTC-Tb. To confirm the successfully covalent binding between PTCA and Tb, the combination was characterized by FTIR spectroscopy. The peak at  $1773.6\text{ cm}^{-1}$  (SFig. 3C, curve a) represents the characteristic stretching vibration of C=O bond related to the carboxylic acid groups of PTCA. The FTIR spectrum of the Tb (SFig. 3C, curve b) exhibits a sharp peak at  $1606.1\text{ cm}^{-1}$  corresponding to the N-H bending vibration. Then the PTC-Tb (SFig. 3C, curve c) produces the absorption feature at  $1334.1\text{ cm}^{-1}$  (–C–N– stretching of acylamino), implying the formation of PTC-Tb.

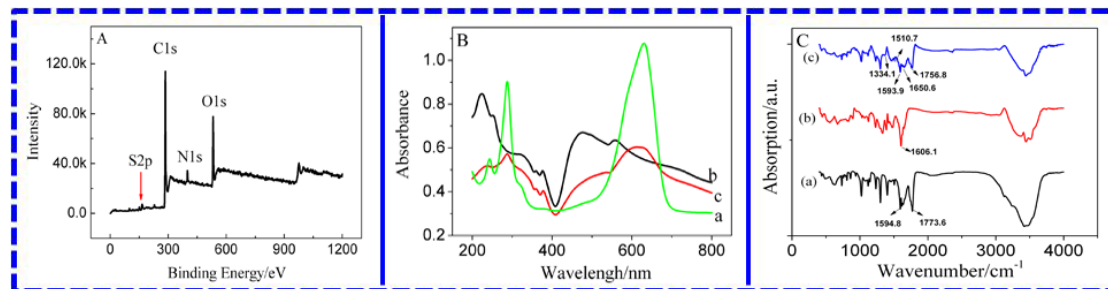

**SFig.3** (A): XPS of PTC-Tb. (B) UV-*vis* and (C) FTIR spectra of PTCA (a); Tb (b) and PTC-Tb (c), respectively.

### Comparison of Differently Modified Electrodes

To demonstrate the EC property of proposed modified electrode, PTCA (a), Tb (b) and PTC-Tb (c) were dropped on the different AuE surfaces and subjected to CV analysis in HAc-NaAc (pH 5.5) at a scan rate of  $50\text{ mV s}^{-1}$ . As illustrated in SFig 4A, curve (a) exhibits redox-activity owing to the electronic property of PTCA

123 but there were miscellaneous redox peaks in the potential region from -0.6 to 0.2 V,  
124 which led to potential signal interference in target quantitative detection. Curve (b)  
125 shows a pair of well-defined redox peaks, corresponding to the reversible redox  
126 reaction of Tb. Interestingly, when PTC-Tb was employed to modify electrode  
127 (SFig 4A, curve c), a pair of well-defined redox peaks could be obtained, which not  
128 only conciliates the miscellaneous redox peaks of PTCA but also can effectively  
129 promote the electron transfer of Tb modified electrode.

130 To investigate the ECL efficiency of PTC-Tb, the contrast experiment to  
131 compare their ECL responses of different modified electrodes under the same  
132 conditions were investigated and the results were shown in SFig. 4B. When PTCA  
133 was coated on the electrode (SFig. 4B, curve a), a noticeable ECL signal of 11242  
134 a.u. was obtained. Tb modified electrode (SFig. 4B, curve b) shows a weak ECL  
135 signal only about 665 a.u.. After PTC-Tb was employed to modify electrode, the  
136 ECL intensity dramatically raised to 13952 a.u. (SFig. 4B, curve c). The  
137 enhancement can be attributed to synergistic effect of PTCA and Tb. On the basis of  
138 EC and ECL results, we can make a conclusion that PTC-Tb is not only a well-  
139 defined EC redox molecule but also a highly efficient co-reactant of ECL  $O_2/S_2O_8^{2-}$   
140 system.

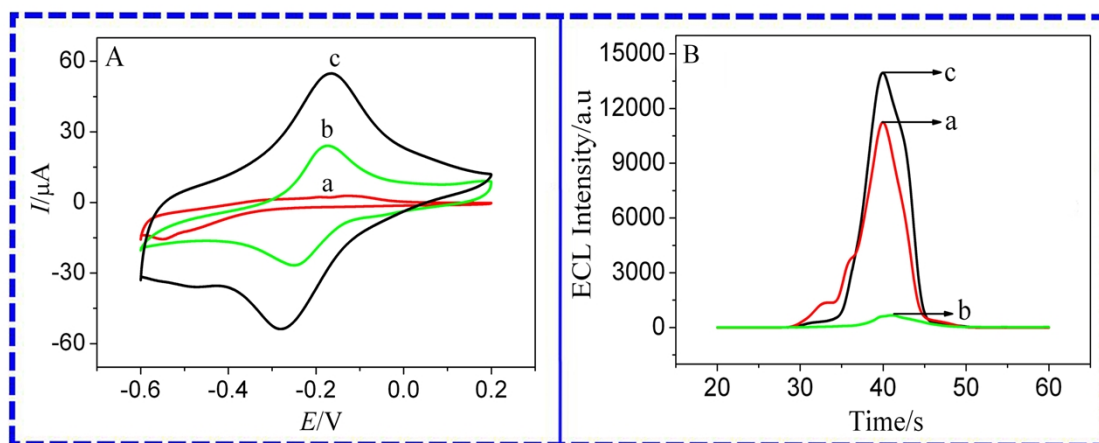

141  
 142 **SFig. 4** (A) CV responses of different electrodes in 0.1 M HAc-NaAc buffer (pH 5.5) at a scan  
 143 rate of  $50 \text{ mV s}^{-1}$  and (B) ECL intensities of different electrodes in 0.1 M HAc-NaAc buffer  
 144 containing 5 mM  $\text{K}_2\text{S}_2\text{O}_8$  (the voltage of the photomultiplier tube was set at 800 V) at a scan rate  
 145 of  $100 \text{ mV s}^{-1}$ : (a) PTCA/AuE; (b) Tb/AuE; (c) PTC-Tb/AuE.

#### 146 Possible Luminescence Mechanism of PTC-Tb

147 SFig. 5 shows the ECL mechanism of the  $\text{O}_2/\text{S}_2\text{O}_8^{2-}$  system by performing ECL  
 148 measurements on the PTC-Tb modified AuE in air-saturated and  $\text{N}_2$ -saturated  
 149 conditions. In the air-saturated HAc-NaAc buffer (pH 5.5) containing 5 mM  $\text{K}_2\text{S}_2\text{O}_8$ ,  
 150 PTC-Tb/AuE exhibits a strong and stable ECL response during the potential scan  
 151 (SFig. 5 a). Nevertheless, after purging the above detection buffer with high purity  $\text{N}_2$   
 152 for 30 min ( $\text{N}_2$ -saturated solution), the ECL signal is sharply decreased (SFig. 5 b vs.  
 153 SFig. 5 a).



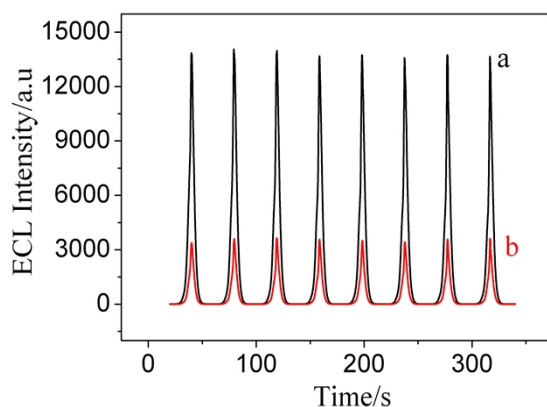

154

155 **SFig. 5** ECL intensity-time curves on the PTC-Tb/AuE (a) in O<sub>2</sub>-saturated and (b) N<sub>2</sub>-saturated

156

0.1 M HAc-NaAc buffer (pH 5.5) containing 5 mM K<sub>2</sub>S<sub>2</sub>O<sub>8</sub>.

157 As supported by the experimental results in SFig. 5, the ECL mechanism of the

158 PTC-Tb in O<sub>2</sub>/S<sub>2</sub>O<sub>8</sub><sup>2-</sup> system can be expressed as the following equations:

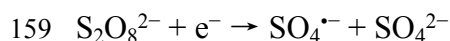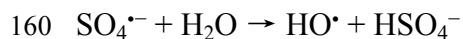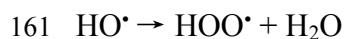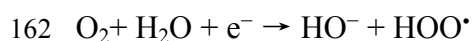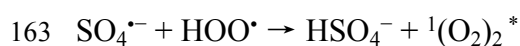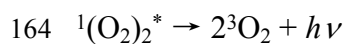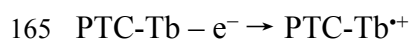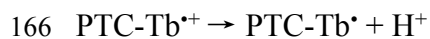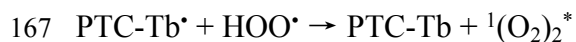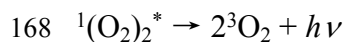

169 **Selectivity**

170 To investigate the selectivity of the proposed aptasensor, the control experiments  
 171 were performed by using bovine serum albumin (BSA, 100 nM) and hemoglobin (Hb,  
 172 100 nM) to replace thrombin (10 nM), respectively. The change of the EC ( $\Delta I$ ) and  
 173 ECL ( $\Delta ECL$ ) responses were used to evaluate the selectivity of the proposed  
 174 aptasensor toward thrombin, which are given by  $\Delta I = I - I_0$  and  $\Delta ECL = |ECL -$   
 175  $ECL_0|$ , respectively (The background noises are recorded as  $I_0$  and  $ECL_0$  toward  
 176 zero analyte, while the EC and ECL responses are recorded as  $I$  and  $ECL$  toward  
 177 different interferents). As shown in SFig. 6, it is found that no remarkable signal was  
 178 observed in comparison with that in the presence of thrombin. Further, the proposed  
 179 aptasensor in a mixture solution (10 nM thrombin containing 100 nM BSA and 100  
 180 nM Hb) was also investigated. Although the high concentration of BSA and Hb are  
 181 coexisted, the detection signals have no apparent difference. The experimental results  
 182 implied acceptable selectivity of the proposed dual-responses aptasensor.

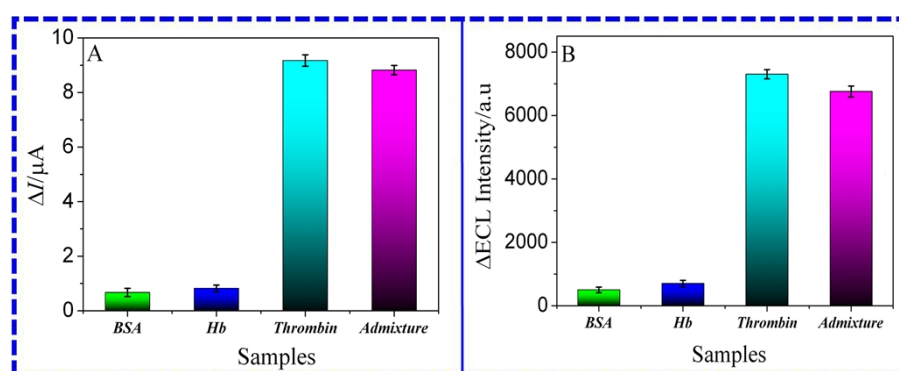

183 **SFig. 6.** (A) EC and (B) ECL selectivity investigation for thrombin (10 nM) detection against  
 184 the interference proteins: BSA (100 nM), Hb (100 nM), Admixture (10 nM thrombin containing  
 185 100 nM BSA and 100 nM Hb). The error bars represent the standard deviations of three  
 186 measurements.

## 188 Analytical application of the aptasensor

189 The analytical reliability and possible application of the proposed aptasensor was  
 190 investigated by recovery experiments. A series of samples were prepared by adding  
 191 thrombin of different concentrations into 10-fold-diluted healthy human serum  
 192 samples (obtained from Ninth People's Hospital of Chongqing, China). As shown in  
 193 STable 1, the EC and ECL recoveries are in the range of 94.0%–110.4% and 93.6%–  
 194 104.0%, respectively. These results clearly demonstrated that the proposed dual-  
 195 responses aptasensor provided a potential application in real biological samples.

196 **STable 1.** Detection of thrombin added in human serum ( $n = 3$ ) with the proposed aptasensor.

| Sample No. | Added thrombin (nM) | Found thrombin (nM) <sup>a</sup> |      | Recovery (%) |       |
|------------|---------------------|----------------------------------|------|--------------|-------|
|            |                     | EC                               | ECL  | EC           | ECL   |
| 1          | 0.75                | 0.80                             | 0.78 | 106.7        | 104.0 |
| 2          | 1.25                | 1.38                             | 1.17 | 110.4        | 93.6  |
| 3          | 2.50                | 2.35                             | 2.39 | 94.0         | 95.6  |
| 4          | 4.75                | 4.88                             | 4.91 | 102.7        | 103.4 |
| 5          | 8.00                | 7.82                             | 7.80 | 97.8         | 97.5  |

197 <sup>a</sup> The values shown here are the average values from three measurements.

198

## 199 References

200 [1]: A. Ambrosi, M. T. Castaneda, A. J. Killard, M. R. Smyth, S. Alegret and A. Merkoci, *Anal.*  
 201 *Chem.* 2007, **79**, 5232.
